# Supplementary material for: BCG vaccination and tuberculosis prevention: A forty years cohort study, Monastir, Tunisia
Source: PLoS One. 2019 Aug 5;14(8):e0219991. doi: 10.1371/journal.pone.0219991 (PMC6682306; doi:10.1371/journal.pone.0219991)
Supplement: S1 Dataset — (XLS) [file pone.0219991.s001.xls]

## Sheet: Feuil1
sex	localization	Vaccinated	Age
1	1	1	3
2	1	1	3
1	1	1	1
1	1	1	4
1	1	1	2
2	1	1	17
2	1	1	15
2	1	1	13
2	1	1	13
1	1	1	2
2	1	1	18
2	1	1	17
1	1	1	15
1	1	1	6
1	1	1	19
1	1	1	22
2	1	1	23
2	1	1	18
2	1	1	16
1	1	1	21
1	1	1	18
1	1	1	16
1	1	1	22
1	1	1	16
2	1	1	23
1	1	1	24
2	1	1	22
1	1	1	22
1	1	1	21
1	1	1	15
1	1	1	27
1	1	1	25
2	1	1	25
1	1	1	21
1	1	1	21
1	1	1	12
2	1	1	27
2	1	1	25
1	1	1	24
2	1	1	21
2	1	1	22
1	1	1	19
2	1	1	17
2	1	1	18
1	1	1	25
1	1	1	18
1	1	1	29
1	1	1	28
2	1	1	24
2	1	1	21
2	1	1	20
2	1	1	20
1	1	1	20
1	1	1	20
2	1	1	19
1	1	1	17
1	1	1	29
2	1	1	29
1	1	1	26
1	1	1	26
1	1	1	22
1	1	1	22
1	1	1	21
1	1	1	16
1	1	1	15
2	1	1	32
1	1	1	32
2	1	1	30
1	1	1	28
1	1	1	25
2	1	1	25
1	1	1	24
2	1	1	22
2	1	1	21
2	1	1	33
2	1	1	28
2	1	1	25
1	1	1	23
2	1	1	23
2	1	1	20
1	1	1	21
2	1	1	16
2	1	1	33
1	1	1	32
1	1	1	29
1	1	1	28
2	1	1	27
1	1	1	26
1	1	1	25
1	1	1	24
2	1	1	22
1	1	1	20
2	1	1	19
2	1	1	19
2	1	1	19
1	1	1	31
1	1	1	32
1	1	1	23
1	1	1	20
2	1	1	20
1	1	1	35
1	1	1	35
1	1	1	32
1	1	1	30
2	1	1	28
2	1	1	27
2	1	1	26
2	1	1	25
2	1	1	22
2	1	1	21
1	1	1	37
2	1	1	36
1	1	1	30
1	1	1	27
1	1	1	28
2	1	1	26
1	1	1	27
1	1	1	23
2	1	1	22
2	1	1	20
1	1	1	20
2	1	1	38
1	1	1	37
1	1	1	39
1	1	1	35
2	1	1	34
2	1	1	31
2	1	1	32
1	1	1	28
1	1	1	27
2	1	1	25
1	1	1	24
1	1	1	23
1	1	1	21
1	1	1	22
1	1	1	26
2	1	0	39
1	1	0	39
1	1	0	37
1	1	0	35
1	1	0	31
1	1	0	31
1	1	0	27
2	1	0	26
1	1	0	27
1	1	0	27
1	1	0	23
1	1	0	38
1	1	0	35
1	1	0	35
2	1	0	34
2	1	0	34
1	1	0	31
2	1	0	30
1	1	0	29
1	1	0	28
1	1	0	27
1	1	0	23
2	1	0	24
1	1	0	42
1	1	0	38
1	1	0	37
1	1	0	37
1	1	0	32
1	1	0	29
1	1	0	29
1	1	0	29
1	1	0	27
1	1	0	26
1	1	0	27
1	1	0	24
1	1	0	42
1	1	0	42
1	1	0	40
1	1	0	38
1	1	0	37
1	1	0	35
1	1	0	32
1	1	0	32
1	1	0	31
1	1	0	29
1	1	0	29
1	1	0	29
2	1	0	28
2	1	0	27
2	1	0	43
1	1	0	42
2	1	0	42
2	1	0	38
1	1	0	36
1	1	0	34
1	1	0	33
1	1	0	32
1	1	0	32
1	1	0	26
2	1	0	26
1	1	0	45
1	1	0	43
1	1	0	41
2	1	0	40
1	1	0	37
1	1	0	33
2	1	0	31
1	1	0	32
1	1	0	30
1	1	0	31
1	1	0	28
1	1	0	28
1	1	0	39
1	1	0	37
1	1	0	36
1	1	0	31
1	1	0	31
1	1	0	28
1	1	0	46
1	1	0	45
1	1	0	35
1	1	0	31
1	1	0	30
1	1	0	31
2	1	0	29
1	1	0	30
1	1	0	45
1	1	0	46
2	1	0	36
1	1	0	33
1	1	0	31
1	1	0	46
2	1	0	44
1	1	0	43
1	1	0	41
1	1	0	40
1	1	0	37
2	1	0	37
2	1	0	35
1	1	0	48
1	1	0	39
1	1	0	36
1	1	0	34
1	1	0	34
1	1	0	33
1	1	0	34
1	1	0	47
1	1	0	47
1	1	0	47
1	1	0	43
1	1	0	41
2	1	0	38
1	1	0	38
1	1	0	38
1	1	0	36
1	1	0	35
1	1	0	34
1	1	0	34
1	1	0	34
1	1	0	51
1	1	0	51
1	1	0	50
1	1	0	47
1	1	0	46
1	1	0	45
1	1	0	39
1	1	0	37
1	1	0	37
1	1	0	35
1	1	0	52
1	1	0	43
1	1	0	37
1	1	0	35
2	1	0	52
1	1	0	49
2	1	0	48
1	1	0	45
1	1	0	43
1	1	0	42
1	1	0	40
2	1	0	37
1	1	0	53
2	1	0	46
2	1	0	45
1	1	0	45
1	1	0	45
1	1	0	40
1	1	0	40
1	1	0	56
1	1	0	55
1	1	0	52
1	1	0	51
2	1	0	50
1	1	0	48
2	1	0	42
1	1	0	42
1	1	0	38
1	1	0	55
1	1	0	52
1	1	0	46
1	1	0	44
1	1	0	41
2	1	0	57
1	1	0	57
2	1	0	51
1	1	0	47
1	1	0	45
1	1	0	43
1	1	0	58
2	1	0	55
1	1	0	54
2	1	0	50
1	1	0	50
1	1	0	50
1	1	0	44
1	1	0	44
2	1	0	43
1	1	0	43
1	1	0	55
1	1	0	46
1	1	0	45
1	1	0	44
1	1	0	43
1	1	0	55
2	1	0	55
1	1	0	53
1	1	0	49
1	1	0	45
1	1	0	45
1	1	0	58
1	1	0	54
1	1	0	51
1	1	0	51
1	1	0	47
1	1	0	62
1	1	0	60
2	1	0	54
1	1	0	51
2	1	0	50
1	1	0	48
2	1	0	47
1	1	0	46
1	1	0	63
1	1	0	63
1	1	0	55
1	1	0	53
1	1	0	51
1	1	0	51
1	1	0	48
1	1	0	48
1	1	0	64
1	1	0	59
2	1	0	59
1	1	0	59
1	1	0	58
1	1	0	55
1	1	0	53
1	1	0	52
2	1	0	51
1	1	0	51
1	1	0	48
1	1	0	48
1	1	0	48
1	1	0	49
1	1	0	48
1	1	0	48
1	1	0	60
1	1	0	60
1	1	0	59
1	1	0	55
1	1	0	54
1	1	0	53
1	1	0	52
1	1	0	50
2	1	0	49
1	1	0	60
1	1	0	56
1	1	0	56
1	1	0	52
1	1	0	51
1	1	0	68
1	1	0	61
1	1	0	60
2	1	0	58
1	1	0	58
1	1	0	58
1	1	0	66
1	1	0	65
1	1	0	64
1	1	0	60
1	1	0	53
1	1	0	52
2	1	0	65
1	1	0	65
1	1	0	62
1	1	0	58
1	1	0	53
1	1	0	57
1	1	0	71
1	1	0	58
1	1	0	57
2	1	0	56
1	1	0	56
2	1	0	55
1	1	0	55
1	1	0	54
2	1	0	61
1	1	0	60
1	1	0	58
1	1	0	56
1	1	0	72
1	1	0	70
2	1	0	67
1	1	0	56
1	1	0	73
2	1	0	66
2	1	0	64
1	1	0	65
1	1	0	64
1	1	0	62
1	1	0	58
1	1	0	67
2	1	0	70
2	1	0	67
2	1	0	63
1	1	0	70
1	1	0	65
1	1	0	65
1	1	0	61
2	1	0	60
1	1	0	74
1	1	0	74
2	1	0	73
2	1	0	71
1	1	0	67
2	1	0	65
1	1	0	61
2	1	0	74
1	1	0	72
1	1	0	81
1	1	0	73
2	1	0	72
1	1	0	64
1	1	0	76
1	1	0	72
1	1	0	72
1	1	0	77
1	1	0	75
2	1	0	73
2	1	0	71
1	1	0	71
1	1	0	72
2	1	0	72
1	1	0	72
1	1	0	69
1	1	0	68
2	1	0	67
1	1	0	76
1	1	0	73
1	1	0	71
2	1	0	69
1	1	0	80
1	1	0	75
1	1	0	74
1	1	0	69
1	1	0	81
2	1	0	75
2	1	0	76
1	1	0	73
1	1	0	72
1	1	0	80
2	1	0	78
1	1	0	76
1	1	0	75
2	1	0	71
1	1	0	80
2	1	0	80
1	1	0	89
1	1	0	81
2	1	0	76
1	1	0	76
1	1	0	77
1	1	0	76
1	1	0	80
1	1	0	76
1	1	0	77
1	1	0	78
2	1	0	89
1	1	0	86
1	1	0	89
1	2
1	2	1	4
1	2	1	2
2	2	1	4
2	2	1	4
1	2	1	2
1	2	1	7
2	2	1	7
2	2	1	3
1	2	1	9
1	2	1	10
1	2	1	8
1	2	1	8
2	2	1	7
1	2	1	6
2	2	1	9
2	2	1	4
2	2	1	13
1	2	1	11
1	2	1	11
2	2	1	9
2	2	1	9
1	2	1	5
1	2	1	12
1	2	1	8
2	2	1	8
1	2	1	4
2	2	1	12
2	2	1	11
2	2	1	6
2	2	1	15
1	2	1	12
1	2	1	8
1	2	1	8
2	2	1	16
1	2	1	10
2	2	1	6
1	2	1	13
2	2	1	11
2	2	1	16
2	2	1	14
2	2	1	10
2	2	1	18
2	2	1	18
2	2	1	19
2	2	1	19
2	2	1	18
1	2	1	22
2	2	1	20
2	2	1	12
2	2	1	23
2	2	1	23
1	2	1	20
2	2	1	11
2	2	1	23
2	2	1	22
2	2	1	20
2	2	1	18
2	2	1	24
2	2	1	23
1	2	1	21
2	2	1	21
2	2	1	20
2	2	1	17
1	2	1	17
1	2	1	26
2	2	1	24
1	2	1	25
1	2	1	23
2	2	1	20
1	2	1	16
1	2	1	25
2	2	1	20
1	2	1	20
2	2	1	18
1	2	1	18
1	2	1	27
1	2	1	24
1	2	1	18
1	2	1	28
1	2	1	26
2	2	1	23
2	2	1	20
2	2	1	20
2	2	1	18
2	2	1	29
2	2	1	27
1	2	1	19
1	2	1	18
1	2	1	30
2	2	1	28
2	2	1	27
1	2	1	26
2	2	1	24
2	2	1	22
2	2	1	31
1	2	1	28
1	2	1	26
2	2	1	27
2	2	1	25
1	2	1	24
2	2	1	23
2	2	1	22
2	2	1	32
2	2	1	32
2	2	1	31
1	2	1	27
2	2	1	25
2	2	1	32
2	2	1	30
2	2	1	30
1	2	1	31
2	2	1	30
2	2	1	30
2	2	1	29
2	2	1	28
2	2	1	26
1	2	1	26
2	2	1	35
1	2	1	35
1	2	1	35
2	2	1	34
2	2	1	33
2	2	1	33
2	2	1	32
2	2	1	29
2	2	1	24
1	2	1	35
2	2	1	35
2	2	1	34
2	2	1	38
2	2	1	38
2	2	1	38
2	2	1	35
1	2	1	34
2	2	1	33
1	2	1	28
2	2	1	28
2	2	1	28
2	2	0	38
2	2	0	38
2	2	0	33
1	2	0	31
2	2	0	39
2	2	0	30
2	2	0	30
2	2	0	39
2	2	0	36
2	2	0	31
2	2	0	41
2	2	0	37
1	2	0	35
2	2	0	35
1	2	0	32
1	2	0	41
2	2	0	41
2	2	0	40
1	2	0	45
1	2	0	39
1	2	0	36
1	2	0	47
2	2	0	46
2	2	0	42
2	2	0	39
1	2	0	37
2	2	0	45
2	2	0	37
2	2	0	47
1	2	0	41
1	2	0	39
2	2	0	47
1	2	0	44
2	2	0	51
2	2	0	43
1	2	0	43
2	2	0	51
2	2	0	50
2	2	0	49
1	2	0	42
1	2	0	53
2	2	0	49
2	2	0	49
2	2	0	47
1	2	0	52
1	2	0	51
2	2	0	51
2	2	0	55
2	2	0	54
2	2	0	49
2	2	0	52
2	2	0	58
1	2	0	56
1	2	0	54
2	2	0	51
2	2	0	49
2	2	0	53
2	2	0	52
2	2	0	48
2	2	0	57
2	2	0	55
2	2	0	59
2	2	0	57
2	2	0	50
1	2	0	59
1	2	0	52
2	2	0	59
2	2	0	52
1	2	0	62
2	2	0	58
2	2	0	57
2	2	0	65
2	2	0	63
2	2	0	58
2	2	0	56
2	2	0	63
2	2	0	61
2	2	0	58
2	2	0	63
2	2	0	67
2	2	0	70
2	2	0	64
1	2	0	70
1	2	0	66
1	2	0	62
2	2	0	71
2	2	0	70
2	2	0	65
2	2	0	73
2	2	0	71
1	2	0	70
2	2	0	68
2	2	0	86
2	2	0	80
2	2	0	88
1	3
1	3	1	0
2	3	1	0
1	3	1	0
2	3	1	0
2	3	1	1
2	3	1	0
1	3	1	1
2	3	1	11
2	3	1	11
2	3	1	10
2	3	1	3
2	3	1	4
1	3	1	5
1	3	1	3
1	3	1	7
2	3	1	15
2	3	1	19
1	3	1	15
2	3	1	6
1	3	1	9
2	3	1	8
1	3	1	7
1	3	1	6
2	3	1	12
2	3	1	9
1	3	1	7
1	3	1	14
2	3	1	13
2	3	1	22
2	3	1	17
1	3	1	16
2	3	1	13
2	3	1	28
2	3	1	22
2	3	1	13
2	3	1	27
2	3	1	30
1	3	1	19
2	3	1	17
1	3	1	14
2	3	1	27
2	3	1	26
2	3	1	25
1	3	1	22
2	3	1	26
1	3	1	20
1	3	1	19
1	3	1	19
1	3	1	15
2	3	1	29
2	3	1	20
1	3	1	15
2	3	1	28
2	3	1	23
2	3	1	27
1	3	1	23
1	3	1	18
2	3	1	31
2	3	1	22
1	3	1	30
2	3	1	21
2	3	1	27
1	3	1	25
1	3	1	35
1	3	1	33
2	3	1	33
2	3	1	22
1	3	1	19
2	3	1	31
1	3	1	25
2	3	1	25
1	3	1	24
2	3	1	30
1	3	1	29
2	3	1	26
1	3	1	27
2	3	1	25
1	3	1	24
2	3	1	26
2	3	1	25
2	3	1	25
2	3	1	22
1	3	1	33
1	3	1	31
2	3	1	33
1	3	1	27
2	3	1	28
1	3	1	27
1	3	1	27
2	3	1	23
2	3	0	31
1	3	0	28
1	3	0	27
2	3	0	23
2	3	0	36
2	3	0	36
1	3	0	27
2	3	0	31
1	3	0	39
1	3	0	36
2	3	0	42
2	3	0	30
2	3	0	29
1	3	0	29
2	3	0	26
1	3	0	25
2	3	0	35
1	3	0	27
2	3	0	41
1	3	0	30
2	3	0	30
1	3	0	30
1	3	0	30
2	3	0	28
1	3	0	27
2	3	0	44
2	3	0	32
1	3	0	31
2	3	0	31
1	3	0	30
1	3	0	29
2	3	0	40
2	3	0	33
1	3	0	35
2	3	0	38
2	3	0	33
2	3	0	34
2	3	0	33
2	3	0	33
1	3	0	43
2	3	0	41
1	3	0	39
2	3	0	46
2	3	0	39
2	3	0	48
1	3	0	41
2	3	0	32
2	3	0	48
2	3	0	45
2	3	0	43
2	3	0	46
2	3	0	36
1	3	0	34
2	3	0	34
1	3	0	33
2	3	0	42
2	3	0	48
1	3	0	39
1	3	0	47
1	3	0	42
2	3	0	41
2	3	0	43
1	3	0	40
2	3	0	52
2	3	0	40
2	3	0	39
2	3	0	38
2	3	0	53
1	3	0	45
1	3	0	37
2	3	0	50
1	3	0	47
2	3	0	51
1	3	0	48
2	3	0	39
1	3	0	50
2	3	0	50
2	3	0	45
2	3	0	50
1	3	0	49
1	3	0	44
2	3	0	55
2	3	0	48
1	3	0	47
2	3	0	57
2	3	0	45
2	3	0	52
2	3	0	46
2	3	0	45
2	3	0	43
1	3	0	58
2	3	0	48
1	3	0	46
1	3	0	44
2	3	0	43
1	3	0	55
2	3	0	59
2	3	0	54
2	3	0	54
2	3	0	49
1	3	0	49
2	3	0	47
2	3	0	47
1	3	0	62
2	3	0	52
2	3	0	51
2	3	0	56
2	3	0	51
1	3	0	46
2	3	0	58
2	3	0	54
2	3	0	51
2	3	0	59
1	3	0	52
2	3	0	60
2	3	0	53
2	3	0	57
1	3	0	65
2	3	0	51
1	3	0	64
1	3	0	58
2	3	0	61
1	3	0	53
2	3	0	52
2	3	0	56
1	3	0	63
2	3	0	57
1	3	0	66
2	3	0	66
2	3	0	62
2	3	0	52
2	3	0	51
1	3	0	63
1	3	0	53
2	3	0	59
1	3	0	58
1	3	0	61
2	3	0	69
2	3	0	55
2	3	0	55
1	3	0	69
2	3	0	67
2	3	0	66
2	3	0	61
2	3	0	70
2	3	0	71
1	3	0	61
2	3	0	58
1	3	0	62
2	3	0	61
1	3	0	66
2	3	0	61
1	3	0	68
1	3	0	64
1	3	0	62
1	3	0	59
2	3	0	65
2	3	0	77
2	3	0	76
1	3	0	67
2	3	0	73
1	3	0	65
1	3	0	64
1	3	0	75
1	3	0	79
2	3	0	71
1	3	0	66
1	3	0	70
1	3	0	68
2	3	0	67
2	3	0	71
1	3	0	73
2	3	0	83
2	3	0	72
1	3	0	68
2	3	0	75
1	3	0	78
2	3	0	78
1	3	0	75
2	3	0	72
1	3	0	77
2	3	0	78
1	3	0	83
2	3	0	84
2	3	0	82
2	3	0	95

## Sheet: Feuil2
sex	1: men
	2 women
localization
1	pulmonary
2	ganglion
3	Extrapul/other
vaccinated	0: No
	1: Yes
